# Supplementary material for: Implications of the Actin Cytoskeleton on the Multi-Step Process of [PSI+] Prion Formation
Source: MDPI journal article supplement (doi:10.3390/v14071581), 2022-07-21
Supplement: s1 [file s1]

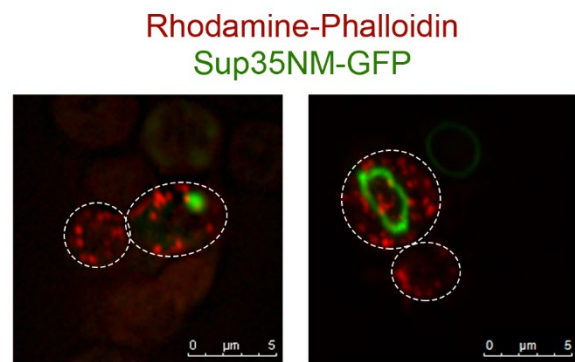

**Figure S1. Rhodamine-phalloidin staining of cells expressing Sup35NM-GFP.** Wildtype cells expressing Sup35NM-GFP for 24 hours, fixed and stained with rhodamine-phalloidin. Images are representative of multiple cells.

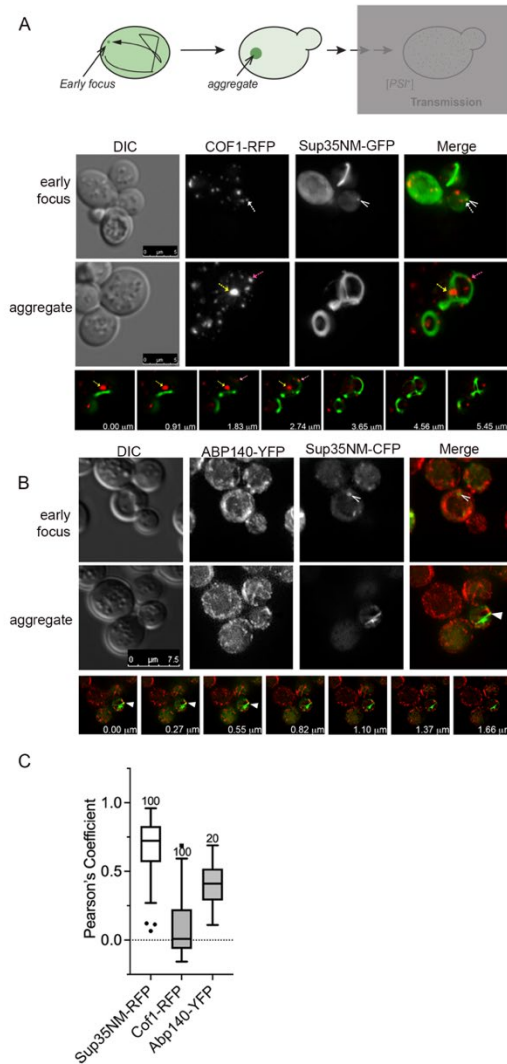

**Figure S2. Sup35NM does not co-localize with Cof1 or Abp140.** A. Top, model showing multiple steps analyzed in this paper. This figure is focused on the presence of early foci and aggregates. B. 74D-694 wildtype cells with Sup35NM-GFP were grown in the presence of 50uM copper sulfate for 16 hours (top; for the detection of early foci) or 24 hours (bottom; for the detection of aggregates). Cells were imaged for Sup35NM-GFP (green) and Cof1-RFP (red). Open carrot indicates the early focus. The lower panel is a z-stack of the middle panel showing the Cof1-RFP inclusion (yellow dashed arrow) in a different plane than the Sup35NM-GFP aggregate (red dashed arrow). B. Same as A, except Sup35NM-CFP (shown in green) and Abp140-YFP (shown in red) are co-expressed. C. Pearson's correlation coefficient was performed on cells either expressing both Sup35NM-GFP and Sup35NM-RFP (as a positive control) or Sup35NM and the indicated actin fluorescent markers. The open carrot indicates the early focus and the closed arrowhead shows the detectable overlap between ABP140-YFP and Sup35NM-CFP signal.



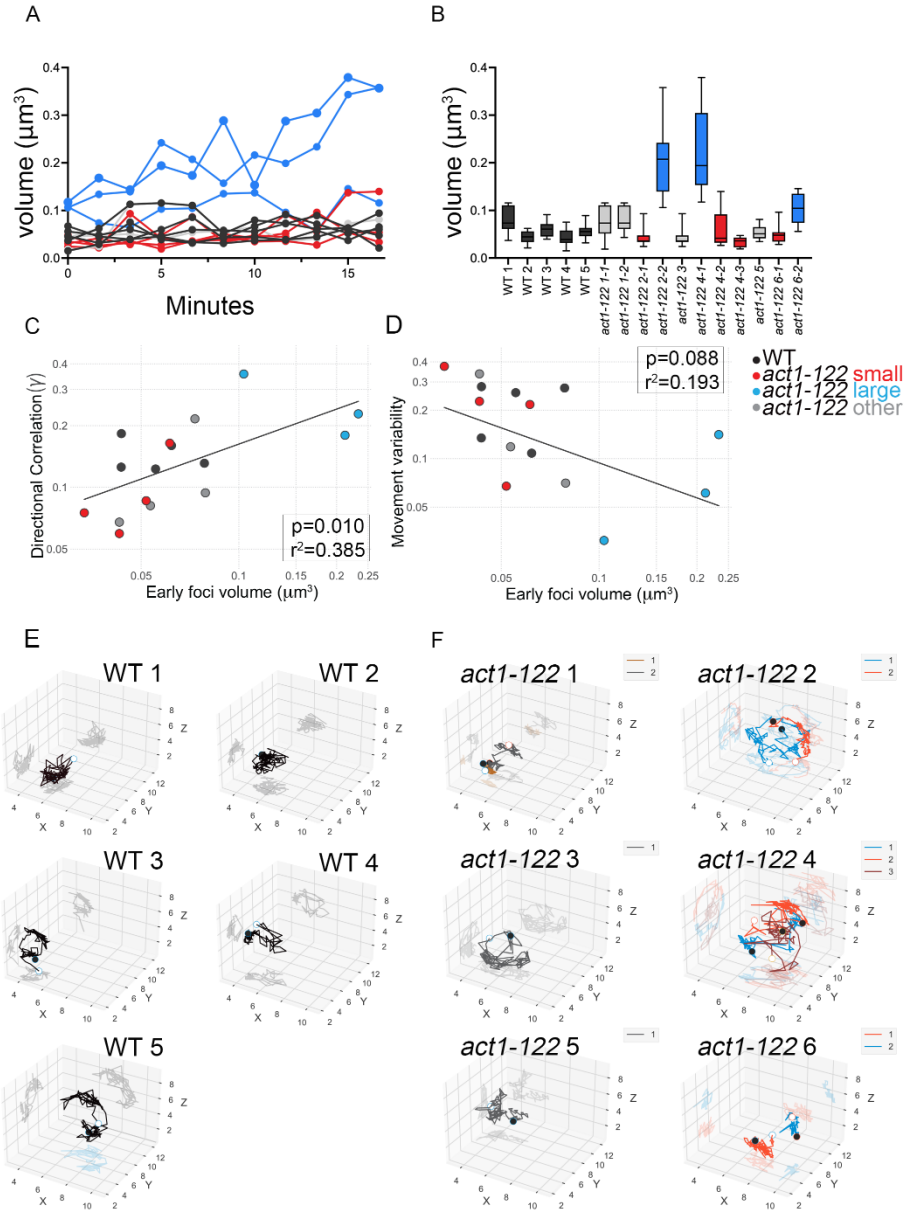

**Figure S4. The movement of early foci is random.** A. Early foci volume assessed over time in wildtype and *act1-122* cells. B. The average volume of each focus is plotted. C. Directional correlation is plotted against early foci volume. D. Movement variability is plotted against early foci volume. Three-dimensional movement of each focus is shown for five wildtype cells (E) and six *act1-122* cells (F). The color of the trace corresponds to the aggregate number shown in B.

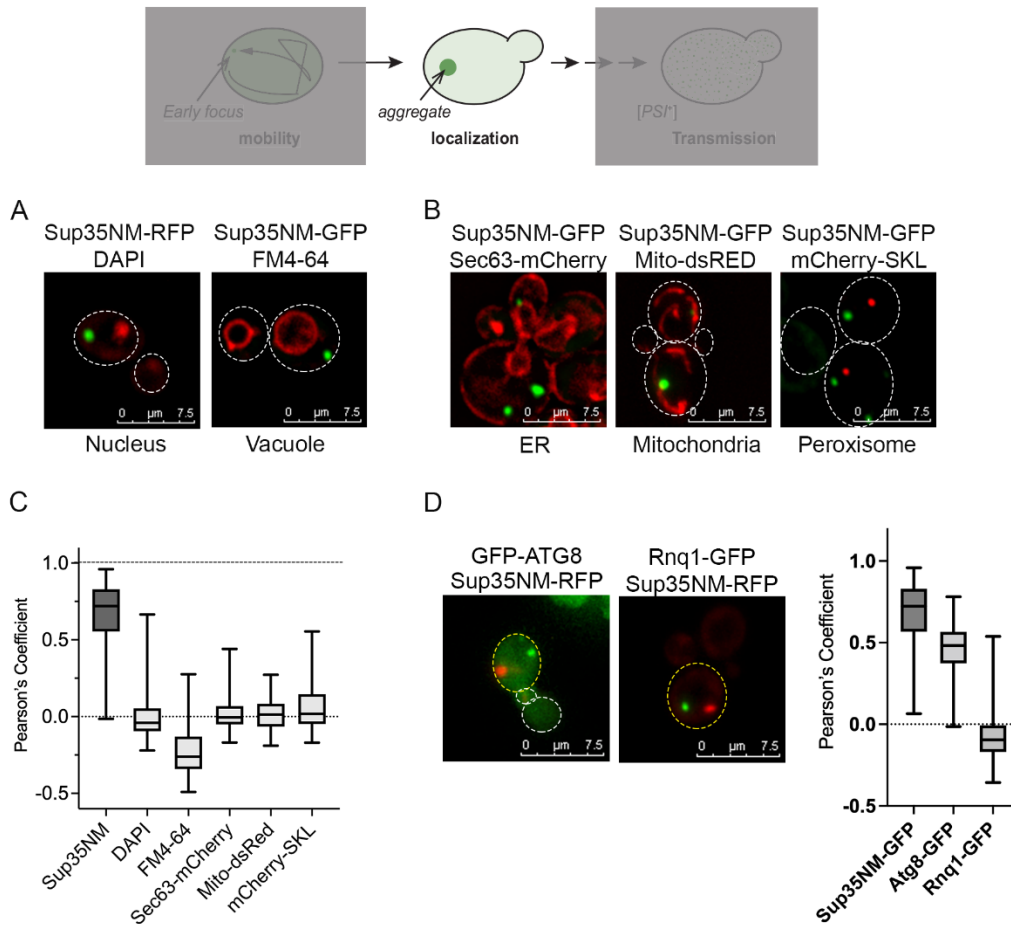

**Figure S5. Newly formed Sup35NM aggregates do not co-localize with organelles or IPOD.** A. Wildtype cells containing Sup35NM (shown in green) aggregates were treated with DAPI for nuclear staining (left, red) or FM-464 for vacuolar staining (right, red). B. Sup35NM-GFP (green) co-expressed with either Sec63 (left, red) to identify the ER, mito-dsRed (middle, red) to identify the mitochondria, or mCherry-SKL (right, red) to identify peroxisomes, are shown. C. Pearson's correlation coefficient was calculated for all images in A and B. D. Co-localization of Sup35NM-RFP (green) aggregates and GFP-Atg8 (left, red) or Rnq1-GFP (right, red). Pearson's correlation coefficient calculation is shown. Note that co-localization between Sup35NM-GFP and Sup35NM-RFP is used as a control. Data shown in C and D are presented as means  $\pm$  SD. All values are significantly different from Sup35NM-GFP/Sup35NM-RFP controls ( $p < 0.001$ ) as determined by Welch's t-test, indicating very little co-localization.

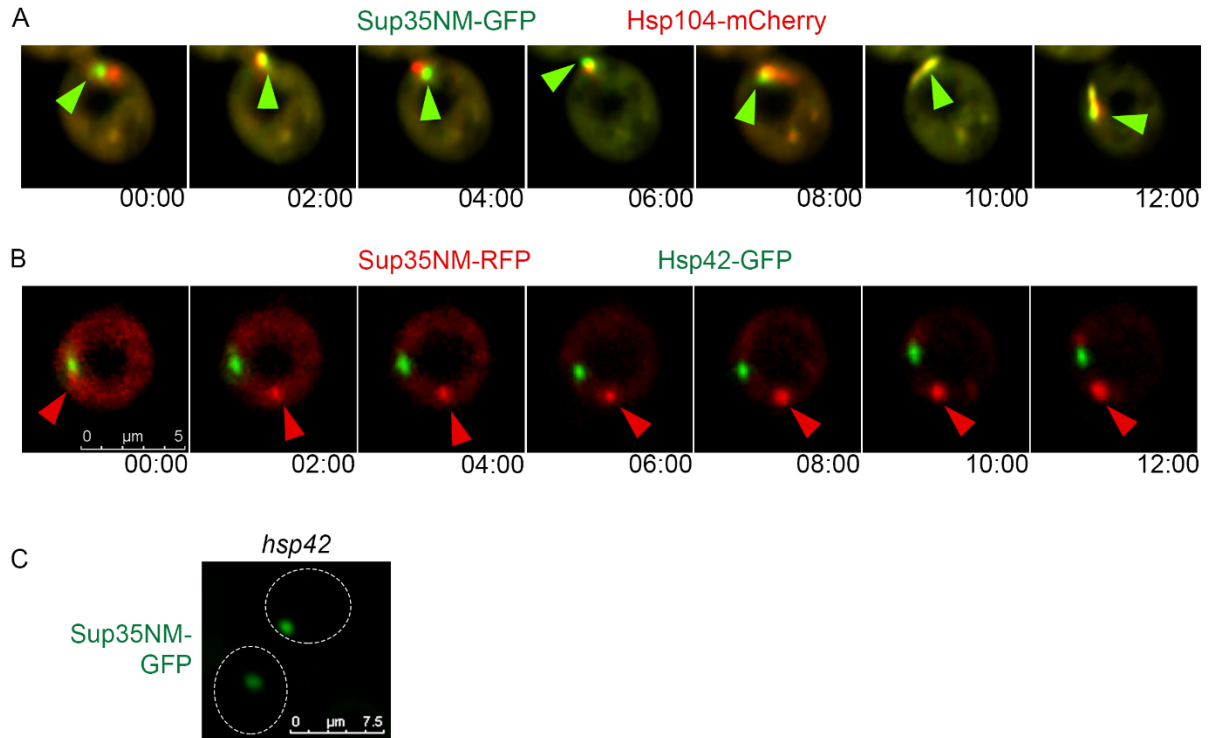

**Figure S6. Early foci show sporadic co-localization with Hsp104, but no co-localization with Hsp42.** A. 3D time-lapse microscopy was performed with Sup35NM-GFP (green) and Hsp104-mCherry. Green arrows indicate the position of early foci. B. Similar to A, except with Sup35NM-RFP (red) and Hsp42 (green), where red arrows indicate early foci. C. Sup35NM-GFP aggregates are observed in *hsp42* $\Delta$  strains.

## Supplementary Tables:

**Supplemental Table S1. Strains used in this study**

| Strain name                              | Genotype                                                                                                       | Lab number<br>(Duplicate Strains) | Genetic Background | Reference  |
|------------------------------------------|----------------------------------------------------------------------------------------------------------------|-----------------------------------|--------------------|------------|
| Wild type high [PIN <sup>+</sup> ]       | <i>MatA his3Δ1; leu2Δ-0; ura3Δ-0; met15Δ-0</i> high [PIN <sup>+</sup> ]                                        | M266 (M102)                       | BY4741             | [1]        |
| Wild type high [PIN <sup>+</sup> ]       | <i>MatA ade1-14 ura3-52 leu2-3,112 trp1-289 his3-200</i> high [PIN <sup>+</sup> ]                              | D233                              | 74D-694            | [2]        |
| <i>Abp140-YFP</i>                        | <i>MatA ade1-14 leu2-3,112 ura3-52 trp1-289 his3-200 Abp140-YFP(Ura3<sup>+</sup>)</i> high [PIN <sup>+</sup> ] | M305                              | 74D-694            | This study |
| Wild type low [PIN <sup>+</sup> ]        | <i>MatA ade1-14 ura3-52 leu2-3,112 trp1-289 his3-200</i> low [PIN <sup>+</sup> ]                               | D231                              | 74D-694            | [3]        |
| <i>act1-122</i> high [PIN <sup>+</sup> ] | <i>MatA his3Δ1; leu2Δ-0; ura3Δ-0; act1-122::NATr; MET15; LYS2</i> high [PIN <sup>+</sup> ]                     | M583 (M600)                       | BY4741             | This study |
| <i>act1-120</i> high [PIN <sup>+</sup> ] | <i>MatA his3Δ1; leu2Δ-0; ura3Δ-0; act1-120::NATr; MET15; LYS2</i> high [PIN <sup>+</sup> ]                     | M310 (M312)                       | BY4741             | [1]        |
| <i>act1-129</i> [PIN <sup>+</sup> ]      | <i>MatA his3Δ1; leu2Δ-0; ura3Δ-0; act1-129::NATr; met15Δ; LYS2</i> high [PIN <sup>+</sup> ]                    | M258                              | BY4741             | [1]        |
| <i>act1-101</i> [PIN <sup>+</sup> ]      | <i>MatA his3Δ1; leu2Δ-0; ura3Δ-0; act1-101::NATr; met15Δ; LYS2</i> high [PIN <sup>+</sup> ]                    | M256                              | BY4741             | [1]        |
| Hsp104-GFP                               | <i>MatA ura3 leu2 his3 met15 Hsp104-GFP (YLL026w); library</i> [PIN <sup>+</sup> ]                             | D228                              | BY4741             | [4]        |
| Hsp42-GFP                                | <i>MatA ura3 leu2 his3 met15 Hsp42-GFP (YDR171w); library</i> [PIN <sup>+</sup> ]                              | D229                              | BY4741             | [4]        |
| Ssa1-GFP                                 | <i>MatA ade1-14 ura3-52 leu2-3,112 trp1-289 his3-200 Ssa1-GFP::KANMX6</i> high [PIN <sup>+</sup> ]             | M262                              | 74D-694            | [5]        |
| Sis1-GFP                                 | <i>MatA ade1-14 ura3-52 leu2-3,112 trp1-289 his3-200 Sis1-GFP::KANMX6</i> high [PIN <sup>+</sup> ]             | M261                              | 74D-694            | [5]        |
| <i>hsp42D</i>                            | <i>MatA ade1-14 leu2-3,112 ura3-52 trp1-289 his3-200 hsp42::HIS3</i> high [PIN <sup>+</sup> ]                  | M383                              | 74D-694            | This study |
| <i>act1-122</i> μdot [PIN <sup>+</sup> ] | <i>MatA his3Δ1; leu2Δ-0; ura3Δ-0; act1-122::NATr; MET15; LYS2</i> μdot [PIN <sup>+</sup> ]                     | M254                              | BY4741             | [1]        |

**Table S2. Plasmids used in this study**

| Plasmid name                             | Lab number   | Yeast Markers            | Reference                       |
|------------------------------------------|--------------|--------------------------|---------------------------------|
| <i>pCUP-RNQ1-GFP</i>                     | <i>p3036</i> | <i>LEU2, CEN</i>         | [6]<br>Fig. S7                  |
| <i>pCUP-SUP35NM-GFP</i>                  | <i>p3031</i> | <i>HIS3, CEN</i>         | [7]<br>Fig. 1-4, 6<br>Fig. S4-6 |
| <i>pCUP-SUP35NM-GFP</i>                  | <i>p3032</i> | <i>LEU2, CEN</i>         | [7]<br>Fig. 5<br>Fig. S1-3, 7   |
| <i>pRS416-pCOF1-COF1RFP</i>              | <i>p3069</i> | <i>URA3, CEN</i>         | [8]<br>Fig. S2                  |
| <i>pABP1-ABP140-3XYFP</i>                | <i>p3089</i> | <i>URA3, Integrating</i> | [9]<br>Fig. S2                  |
| <i>pCUP-Sup35NM:CFP</i>                  | <i>p3053</i> | <i>HIS3, CEN</i>         | [10]<br>Fig. S2                 |
| <i>pCUP-Sup35NM-RFP</i>                  | <i>p3121</i> | <i>URA3, CEN</i>         | [11]<br>Fig. 4<br>Fig. S7-8     |
| <i>pRS416-pSec63-Sec63-mCherry-Tcyc1</i> | <i>p3165</i> | <i>URA3, CEN</i>         | [12]<br>Fig. S7                 |
| <i>pYX142 mito-dsRed</i>                 | <i>p3162</i> | <i>LEU2, CEN</i>         | [13]<br>Fig. S7                 |
| <i>pRS416-pGPD-mCherry-SKL-Tcyc1</i>     | <i>p3167</i> | <i>URA3, CEN</i>         | [12]<br>Fig. S7                 |
| <i>pCUP-GFP-ATG8</i>                     | <i>p3068</i> | <i>URA3, CEN</i>         | [14]<br>Fig. S7                 |
| <i>pAG415-GPD-Hsp104-mCherry</i>         | <i>p3172</i> | <i>LEU2, CEN</i>         | [15]<br>Fig. 4<br>Fig. S8       |
| <i>pLEU2ura3-14</i>                      | <i>p3107</i> | <i>LEU2, CEN</i>         | [16]<br>Fig. 6                  |

*pCUP* is a copper-inducible promoter. *GPD* is a constitutive promoter.

## Reference

- Dorweiler, J.E.; Oddo, M.J.; Lyke, D.R.; Reilly, J.A.; Wisniewski, B.T.; Davis, E.E.; Kuborn, A.M.; Merrill, S.J.; Manogaran, A.L. The actin cytoskeletal network plays a role in yeast prion transmission and contributes to prion stability. *Mol. Microbiol.* **2020**, *114*, 480–494. <https://doi.org/10.1111/mmi.14528>.
- Derkatch, I.L.; Bradley, M.E.; Zhou, P.; Chernoff, Y.O.; Liebman, S.W. Genetic and environmental factors affecting the de novo appearance of the [PSI<sup>+</sup>] prion in *Saccharomyces cerevisiae*. *Genetics* **1997**, *147*, 507–519.
- Bradley, M.E.; Edskes, H.K.; Hong, J.Y.; Wickner, R.B.; Liebman, S.W. Interactions among prions and prion "strains" in yeast. *Proc. Natl. Acad. Sci. USA* **2002**, *99* (Suppl. 4), 16392–16399. <https://doi.org/10.1073/pnas.152330699>.
- Huh, W.K.; Falvo, J.V.; Gerke, L.C.; Carroll, A.S.; Howson, R.W.; Weissman, J.S.; O'Shea, E.K. Global analysis of protein localization in budding yeast. *Nature* **2003**, *425*, 686–691. <https://doi.org/10.1038/nature02026>.
- Klaips, C.L.; Hochstrasser, M.L.; Langlois, C.R.; Serio, T.R. Spatial quality control bypasses cell-based limitations on proteostasis to promote prion curing. *eLife* **2014**, *3*, e04288. <https://doi.org/10.7554/eLife.04288>.
- Sondheimer, N.; Lindquist, S. Rnq1: An epigenetic modifier of protein function in yeast. *Mol. Cell* **2000**, *5*, 163–172.



7. Zhou, P.; Derkatch, I.L.; Liebman, S.W. The relationship between visible intracellular aggregates that appear after overexpression of Sup35 and the yeast prion-like elements [PSI(+)] and [PIN(+)]. *Mol. Microbiol.* **2001**, *39*, 37–46, doi:mml2224 [pii].
8. Lin, M.C.; Galletta, B.J.; Sept, D.; Cooper, J.A. Overlapping and distinct functions for cofilin, coronin and Aip1 in actin dynamics in vivo. *J. Cell Sci.* **2010**, *123*, 1329–1342. <https://doi.org/10.1242/jcs.065698>.
9. Buttery, S.M.; Yoshida, S.; Pellman, D. Yeast formins Bni1 and Bnr1 utilize different modes of cortical interaction during the assembly of actin cables. *Mol. Biol. Cell* **2007**, *18*, 1826–1838. <https://doi.org/10.1091/mbc.E06-09-0820>.
10. Du, Z.; Valtierra, S.; Li, L. An insight into the complex prion-prion interaction network in the budding yeast *Saccharomyces cerevisiae*. *Prion* **2014**, *8*, 387–392. <https://doi.org/10.4161/19336896.2014.992274>.
11. Arslan, F.; Hong, J.Y.; Kanneganti, V.; Park, S.K.; Liebman, S.W. Heterologous aggregates promote de novo prion appearance via more than one mechanism. *PLoS Genet.* **2015**, *11*, e1004814. <https://doi.org/10.1371/journal.pgen.1004814>.
12. Wang, C.W.; Miao, Y.H.; Chang, Y.S. Control of lipid droplet size in budding yeast requires the collaboration between Fld1 and Ldb16. *J. Cell Sci.* **2014**, *127*, 1214–1228. <https://doi.org/10.1242/jcs.137737>.
13. Naylor, K.; Ingeman, E.; Okreglak, V.; Marino, M.; Hinshaw, J.E.; Nunnari, J. Mdv1 interacts with assembled dnm1 to promote mitochondrial division. *J. Biol. Chem.* **2006**, *281*, 2177–2183. <https://doi.org/10.1074/jbc.M507943200>.
14. Wang, K.; Yang, Z.; Liu, X.; Mao, K.; Nair, U.; Klionsky, D.J. Phosphatidylinositol 4-kinases are required for autophagic membrane trafficking. *J. Biol. Chem.* **2012**, *287*, 37964–37972. <https://doi.org/10.1074/jbc.M112.371591>.
15. Malinowska, L.; Kroschwald, S.; Munder, M.C.; Richter, D.; Alberti, S. Molecular chaperones and stress-inducible protein-sorting factors coordinate the spatiotemporal distribution of protein aggregates. *Mol. Biol. Cell* **2012**, *23*, 3041–3056. <https://doi.org/10.1091/mbc.E12-03-0194>.
16. Manogaran, A.L.; Kirkland, K.T.; Liebman, S.W. An engineered nonsense URA3 allele provides a versatile system to detect the presence, absence and appearance of the [PSI+] prion in *Saccharomyces cerevisiae*. *Yeast* **2006**, *23*, 141–147. <https://doi.org/10.1002/yea.1341>.
